# Supplementary material
Source: PubMed Central journal article supplement (PMC8962120)
Supplement: NIHMS1786933-supplement-Supplemental_Material.pdf [file NIHMS1786933-supplement-Supplemental_Material.pdf]

## Appendix

### Exhibit 1. MCED Test Features and Relevant Clinical and Payer Implications

| MCED Test Features                                                                                  | Potential Clinical Implications <sup>1</sup>                                                                                                                                                                                                                                                                                                                                                                  | Private Payer Implications                                                                                                                                                                                                                                                                                                                                            | Medicare Implications                                                                                                                                                                                                                                    |
|-----------------------------------------------------------------------------------------------------|---------------------------------------------------------------------------------------------------------------------------------------------------------------------------------------------------------------------------------------------------------------------------------------------------------------------------------------------------------------------------------------------------------------|-----------------------------------------------------------------------------------------------------------------------------------------------------------------------------------------------------------------------------------------------------------------------------------------------------------------------------------------------------------------------|----------------------------------------------------------------------------------------------------------------------------------------------------------------------------------------------------------------------------------------------------------|
| Requires adaptation of “one test, one cancer” evidentiary framework for evaluating clinical utility | <ul style="list-style-type: none"> <li>• Benefits/harms differ by tumor site</li> <li>• Increase CDR because of reliance on aggregate prevalence of rare and common cancers</li> <li>• Impact on survival and patient QoL requires large studies</li> <li>• Simple blood draw facilitates screening compliance/accessibility</li> <li>• Concerns re overdiagnosis, lead time bias, false positives</li> </ul> | <ul style="list-style-type: none"> <li>• Cancer detection insufficient; need evidence of net patient benefit</li> <li>• Benefits of test depends on cancer types/stages detected and differences in stage-specific treatment outcomes and costs</li> <li>• May wait for practice guideline groups to independently assess clinical utility before covering</li> </ul> | <ul style="list-style-type: none"> <li>• No defined benefit category for MCED screening</li> <li>• Legislation introduced in US Congress to include coverage of FDA approved tests; uncertain whether bill will pass</li> </ul>                          |
| Screening tests have unique coverage requirements                                                   | <ul style="list-style-type: none"> <li>• Risk/benefit evaluation very stringent for presumably cancer-free patients</li> <li>• Typically require evidence of impact of screening on cancer-specific mortality</li> <li>• USPSTF review of new screening tests represents high evidence bar</li> </ul>                                                                                                         | <ul style="list-style-type: none"> <li>• Coverage for follow-up diagnostics varies by payer and may lead to substantial out-of-pocket costs for patients</li> <li>• Adds to concerns re costs of false positives, overdiagnosis</li> <li>• USPSTF A or B rating makes screening test a contractual benefit</li> </ul>                                                 | <ul style="list-style-type: none"> <li>• Medicare can only cover new prostate or CRC screening tests without specific enabling legislation or USPSTF recommendation A/B</li> <li>• All screening tests require CMS National Coverage Decision</li> </ul> |
| Not a substitute for current screening modalities                                                   | <ul style="list-style-type: none"> <li>• Added to current SOC screening interventions that have varying testing recommendations</li> <li>• Retest interval for MCED tests may be every 1-2 years</li> <li>• May decrease compliance with SOC screening</li> </ul>                                                                                                                                             | <ul style="list-style-type: none"> <li>• Adds to budget impact</li> <li>• Harms of SOC interventions well-defined; harms for MCED may differ by tumor site</li> <li>• Lack of clinical utility data compared to SOC screening likely to be a reason for coverage denial</li> </ul>                                                                                    | <ul style="list-style-type: none"> <li>• One path to coverage is USPSTF recommendation A or B</li> <li>• Likely to require FDA approved test for coverage</li> <li>• May require legislative changes to cover new screening test</li> </ul>              |
| Large average risk population (ages $\geq 50$ years) eligible for MCED testing                      | <ul style="list-style-type: none"> <li>• Demand likely to be high, but will lead to screening paradigm shift requiring extensive public education</li> <li>• May improve compliance with cancer screening due to ease of use</li> <li>• PCPs will be main prescribers of tests, requiring education re</li> </ul>                                                                                             | <ul style="list-style-type: none"> <li>• Shifts more patients from “healthy” to cancer diagnosis in short-term</li> <li>• Self-insured employers may request insurers to cover testing given potential direct and indirect cost impacts</li> <li>• Payers and employers generally may restrict test access initially to high-risk subgroups</li> </ul>                | <ul style="list-style-type: none"> <li>• Higher PPV in Medicare population given cancer risk increases with age, but also potentially higher net expenditures if substantial survival benefits are realized</li> </ul>                                   |

|                                                                                                                          |                                                                                                                                                                                                                                                       |                                                                                                                                                                                                                                        |                                                                                                                                                                                                                                                                     |
|--------------------------------------------------------------------------------------------------------------------------|-------------------------------------------------------------------------------------------------------------------------------------------------------------------------------------------------------------------------------------------------------|----------------------------------------------------------------------------------------------------------------------------------------------------------------------------------------------------------------------------------------|---------------------------------------------------------------------------------------------------------------------------------------------------------------------------------------------------------------------------------------------------------------------|
|                                                                                                                          | test interpretation and specialty f/u referrals                                                                                                                                                                                                       | because of concerns re insurance premium increases                                                                                                                                                                                     |                                                                                                                                                                                                                                                                     |
| Patient access will require payer coverage to avoid inequities in screening and potential disparities in cancer outcomes | <ul style="list-style-type: none"> <li>• Individuals at greatest risk of missed cancers may be least likely to be able to pay out-of-pocket</li> <li>• May exacerbate existing disparities in cancer outcomes</li> </ul>                              | <ul style="list-style-type: none"> <li>• In early stages of adoption, IDN's may offer MCED tests at no or reduced cost as market differentiator and in exchange for data sharing (e.g., MCED registry) with test developers</li> </ul> | <ul style="list-style-type: none"> <li>• CMS may pursue access for all Medicare beneficiaries in long-term, but legislative realities will constrain access in near-term</li> <li>• Medicare Advantage plans can choose to offer access to their members</li> </ul> |
| Economic impact of testing                                                                                               | <ul style="list-style-type: none"> <li>• Depends on test price and testing interval</li> <li>• May identify many new cancers in initial years of adoption but at earlier stages when treatment costs are lower than for metastatic disease</li> </ul> | <ul style="list-style-type: none"> <li>• Major barrier for coverage – may significantly increase premiums for everyone in short term</li> <li>• May be less influenced by CE data given member turn-over</li> </ul>                    | <ul style="list-style-type: none"> <li>• CBO will evaluate budget impact for Medicare if MCED tests become a covered benefit</li> <li>• Long-term benefits (improved survival, QoL) consistent with Medicare's mission</li> </ul>                                   |

<sup>1</sup>Not an exhaustive list; potential implications developed based on published information

Abbreviations: CBO – Congressional Budget Office; CDR – cancer detection rate; CE- cost-effectiveness; CMS – Centers for Medicare and Medicaid Services; CRC – colorectal cancer; FDA – Food and Drug Administration; IDN – integrated delivery network; MCED – multi-cancer early detection; PCP – primary care provider; PPV – positive predictive value; SOC – standard of care; QoL – quality of life; USPSTF – United States Preventive Services Task Force.
